# Supplementary material for: Discovery of Triple Inhibitors of Both SARS-CoV-2 Proteases and Human Cathepsin L
Source: MDPI journal article supplement (doi:10.3390/ph15060744), 2022-06-13
Supplement: s1 [file s1]

## Supplementary Data

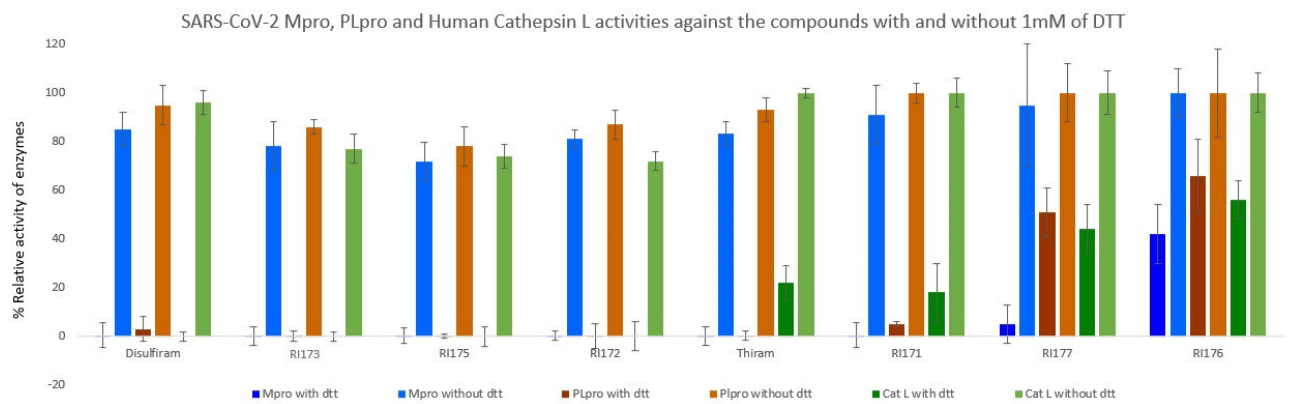

**Figure S1.** SARS-CoV-2 Mpro, PLpro and Human Cathepsin L activities against the compounds with and without 1mM of DTT.

### A Screening of drug candidates against TMPRSS2

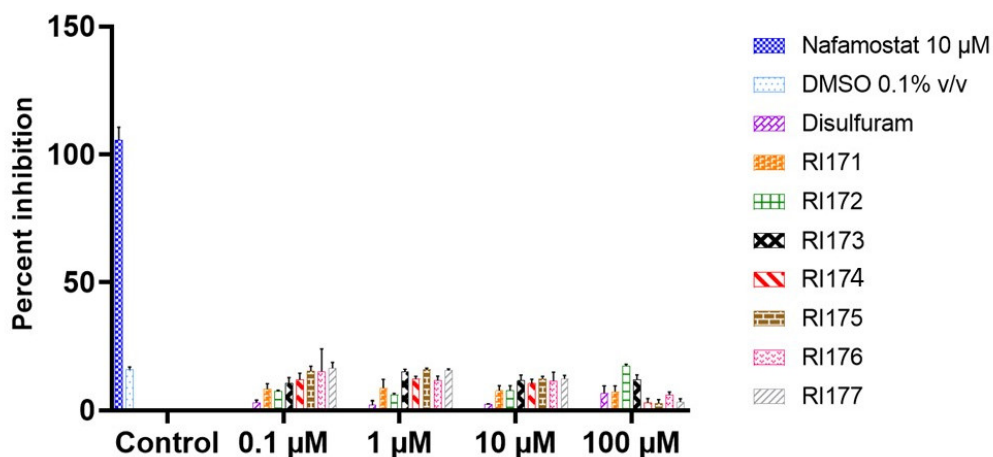

### B Screening of drug candidates against Thrombin

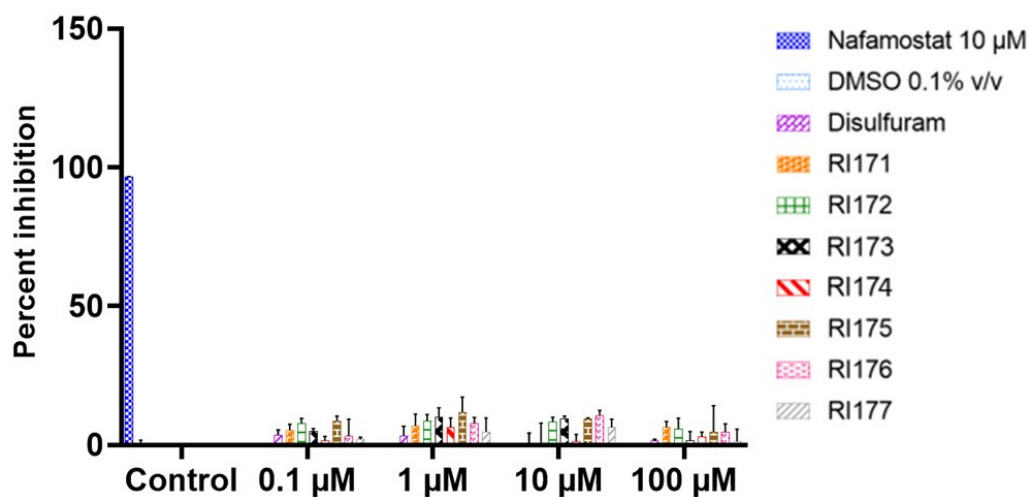

**Figure S2.** Counter-screening on Disulfiram and selected thiuram disulfide compounds at 0.1, 1, 10, 100  $\mu$ M against 1 nM and 10 nM of (A) TMPRSS2 and (B) Thrombin, respectively.
